# Supplementary material for: iPSC-Derived MSCs Versus Originating Jaw Periosteal Cells: Comparison of Resulting Phenotype and Stem Cell Potential
Source: MDPI journal article supplement (doi:10.3390/ijms21020587), 2020-01-16
Supplement: s1 [file s1]

**Supplementary Materials:** Figure S1: HLA-I and HLA-II expression of JPCs and iMSCs.

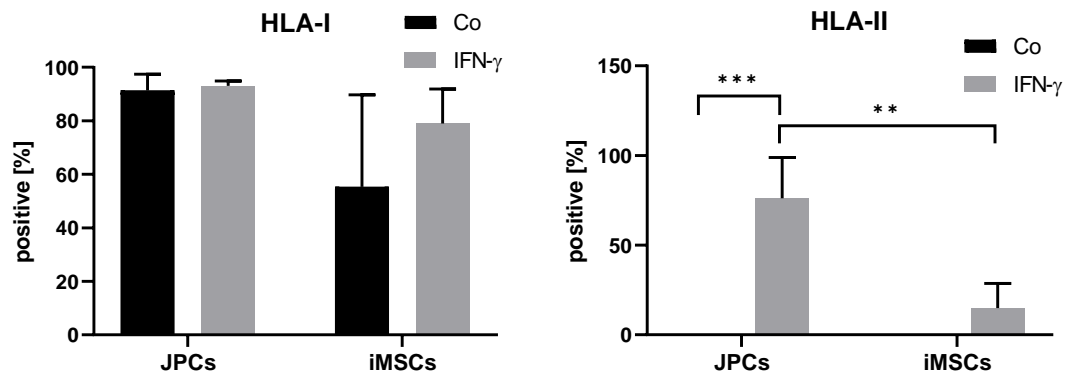

**Figure S1.** HLA-I and HLA-II expression of JPCs and iMSCs of untreated samples (Co) and after stimulation with 200 ng/ml IFN- $\gamma$  (Sigma-Aldrich, St. Louis, USA) for 7 days (IFN- $\gamma$ ). Surface marker expression was detected by flow cytometry using APC-conjugated anti-HLA-I and anti-HLA-II antibodies (Biolegend, San Diego, USA). Positive cells were gated on the basis of the corresponding isotype control samples. Differences in surface marker expression were compared using two-way ANOVA ( $n = 3$  patients,  $** = p < 0.01$ ,  $*** = p < 0.001$ ).
